# Supplementary material
Source: publisher site journal article supplement (https://www.dovepress.com/get_supplementary_file.php?f=262052.docx)
Supplement: Supplementary file 1 [file get_supplementary_file.php]

Table S1 Sequences of primers used for quantitative RT-PCR

|  | Gene | Sequence |
| --- | --- | --- |
| [NM_001145366.1](https://www.ncbi.nlm.nih.gov/entrez/viewer.fcgi?db=nucleotide&id=223941853) | PPARγ | TTTCAAGGGTGCCAGTTTCG (Sense) |
|  |  | GGAGGCCAGCATGGTGTAGAT (Antisense) |
| [NM_021578.2](https://www.ncbi.nlm.nih.gov/entrez/viewer.fcgi?db=nucleotide&id=148747597) | TGF-β1 | CTAATGGTGGACCGCAACAAC (Sense) |
|  |  | GTAACGCCAGGAATTGTTGCTAT (Antisense) |
| [NM_031004.2](https://www.ncbi.nlm.nih.gov/entrez/viewer.fcgi?db=nucleotide&id=148298812) | α-SMA | ACCATCGGGAATGAACGCTT (Sense) |
|  |  | CTGTCAGCAATGCCTGGGTA (Antisense) |
| [NM_053304.1](https://www.ncbi.nlm.nih.gov/entrez/viewer.fcgi?db=nucleotide&id=158711703) | Collagen I | AGAGGCATAAAGGGTCATCGTG (Sense) |
|  |  | AGACCGTTGAGTCCATCTTTGC (Antisense) |
| [NM_017008.4](http://www.ncbi.nlm.nih.gov/entrez/viewer.fcgi?db=nucleotide&id=402691727) | GAPDH | CTGGAGAAACCTGCCAAGTATG (Sense) |
|  |  | GGTGGAAGAATGGGAGTTGCT (Antisense) |
